# Supplementary material
Source: MDPI journal article supplement (https://www.mdpi.com/2073-445X/12/8/1614)
Supplement: s1 [file s1]

## Supplementary document

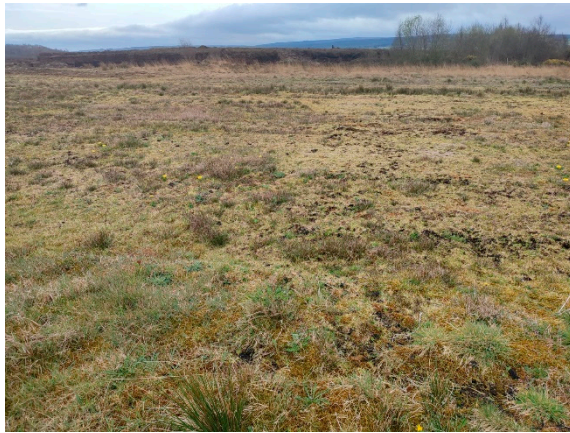

(a)

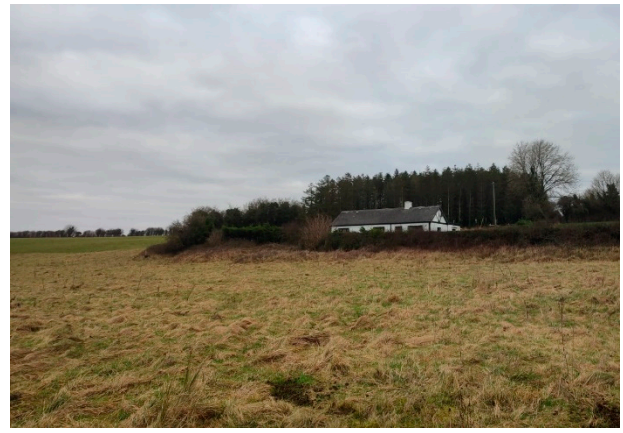

(b)

**Figure S1.** (a) The geographical view of the raised semi-degraded peat located in County Laois; (b) The geographical view of the cutaway peatland located in County Offaly.

### Preparation of culture media

#### 1) Nutrient agar

##### Formula:

Bacteriological agar 15 g/L

Peptone 5 g/L

Meat extract 3 g/L

23 g of the nutrient agar medium was dissolved in 1000 ml of deionized water and brought up to the boiling. The resulting medium was sterilized by autoclaving at 120°C for 15 min.

#### 2) Tryptic soy agar (TSA)

##### Formula:

Bacteriological agar 15 g/L

Sodium chloride 5 g/L

Soy peptone 5 g/L

Tryptic digest of casein 15 g/L

40 g of the TSA medium was dissolved in 1000 ml of deionized water and brought up to the boiling. The resulting medium was sterilized by autoclaving at 120°C for 15 min.

#### 3) Starch Casein agar (SCA)

10.0g of starch, 2.0g of  $K_2HPO_4$ , 2.0g of  $KNO_3$ , 0.3g of casein, 0.05g of  $MgSO_4 \cdot 7H_2O$ , 0.02g of  $CaCO_3$ , 0.01g of  $FeSO_4 \cdot 7H_2O$  and 15.0g of bacteriological agar were dissolved in 1000ml of deionized water and brought up to the boiling. The resulting medium was sterilized by autoclaving at 120°C for 15 min.

#### **4) Pikovskaya medium**

0.5g of yeast extract, 5.0g of  $Ca_3(PO_4)_2$ , 0.5g of  $(NH_4)_2(SO_4)$ , 0.2g of KCl, 0.1g of  $MgSO_4$ , 0.0001g of  $MnSO_4$ , 0.0001g of  $FeSO_4$  and 15.0g of bacteriological agar were dissolved in 950ml of deionized water and brought up to the boiling. The resulting medium was sterilized by autoclaving at 120°C for 15 min. 10.0g of dextrose was dissolved in 50ml of deionized water, the solution was filter sterilized (to avoid the sugar caramelization) and added to the autoclaved medium.

#### **5) Czapek Dox agar (half-strength)**

17.50g of Czapek-Dox medium and 15.0g of bacteriological agar were dissolved in 1000 ml of deionized water and brought up to the boiling. The resulting medium was sterilized by autoclaving at 120°C for 15 min.

#### **6) Anaerobic agar**

51.0g of anaerobic agar medium was dissolved in 1000ml of deionized water and brought up to the boiling. The resulting medium was sterilized by autoclaving at 120°C for 15 min.
